# Supplementary material for: Technical note: Diagnostic efficiency – specific evaluation of model performance
Source: Copernicus journal article supplement (doi:10.5194/hess-25-2187-2021), 2021-04-22
Supplement: Supplementary file 1 [file hess-25-2187-2021-supplement.pdf]

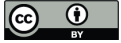

*Supplement of*

## **Technical note: Diagnostic efficiency – specific evaluation of model performance**

**Robin Schwemmler et al.**

*Correspondence to:* Robin Schwemmler ([robin.schwemmler@hydrology.uni-freiburg.de](mailto:robin.schwemmler@hydrology.uni-freiburg.de))

The copyright of individual parts of the supplement might differ from the article licence.

# Supplement

5

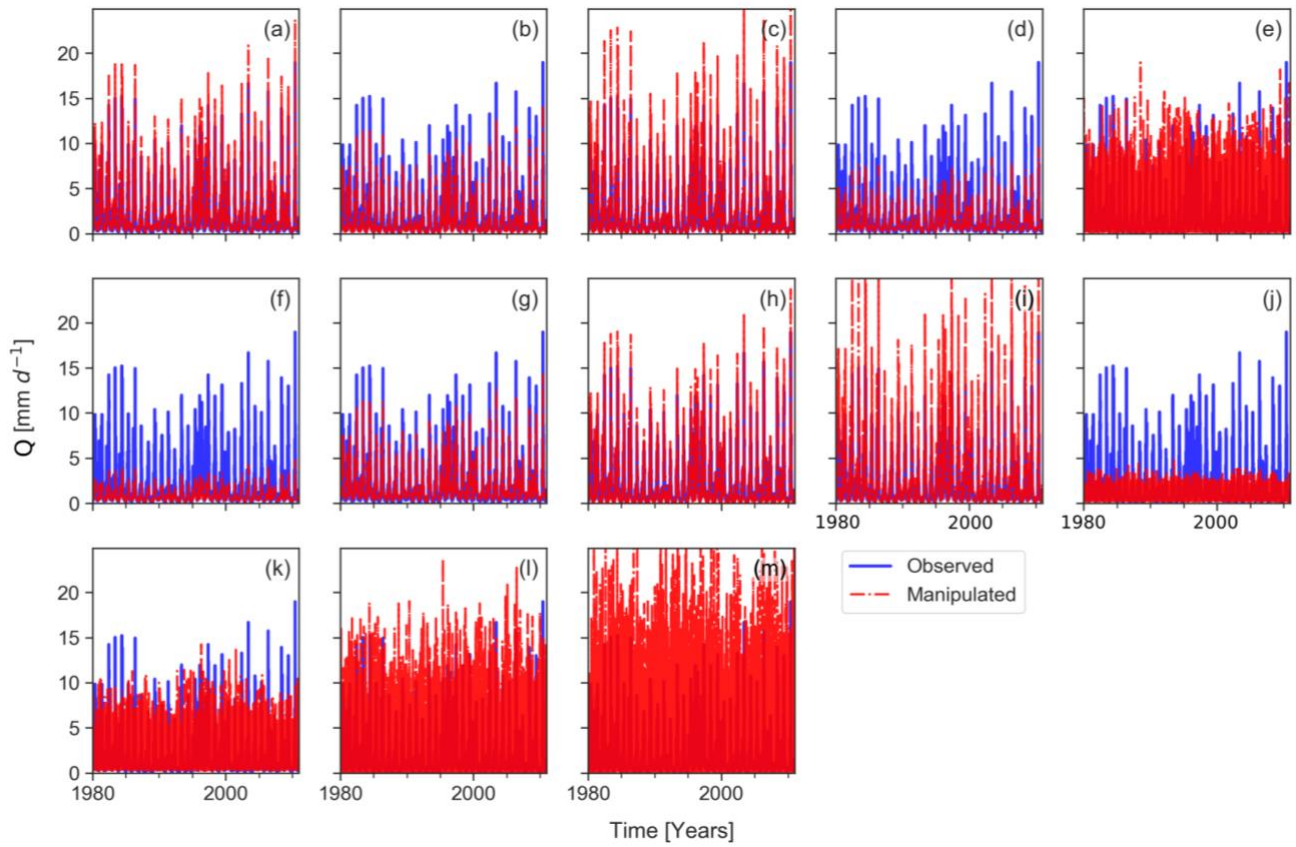

**Figure S1: Observed streamflow time series and manipulated streamflow time series generated by mimicking constant errors, dynamic errors and timing errors (a-m)**

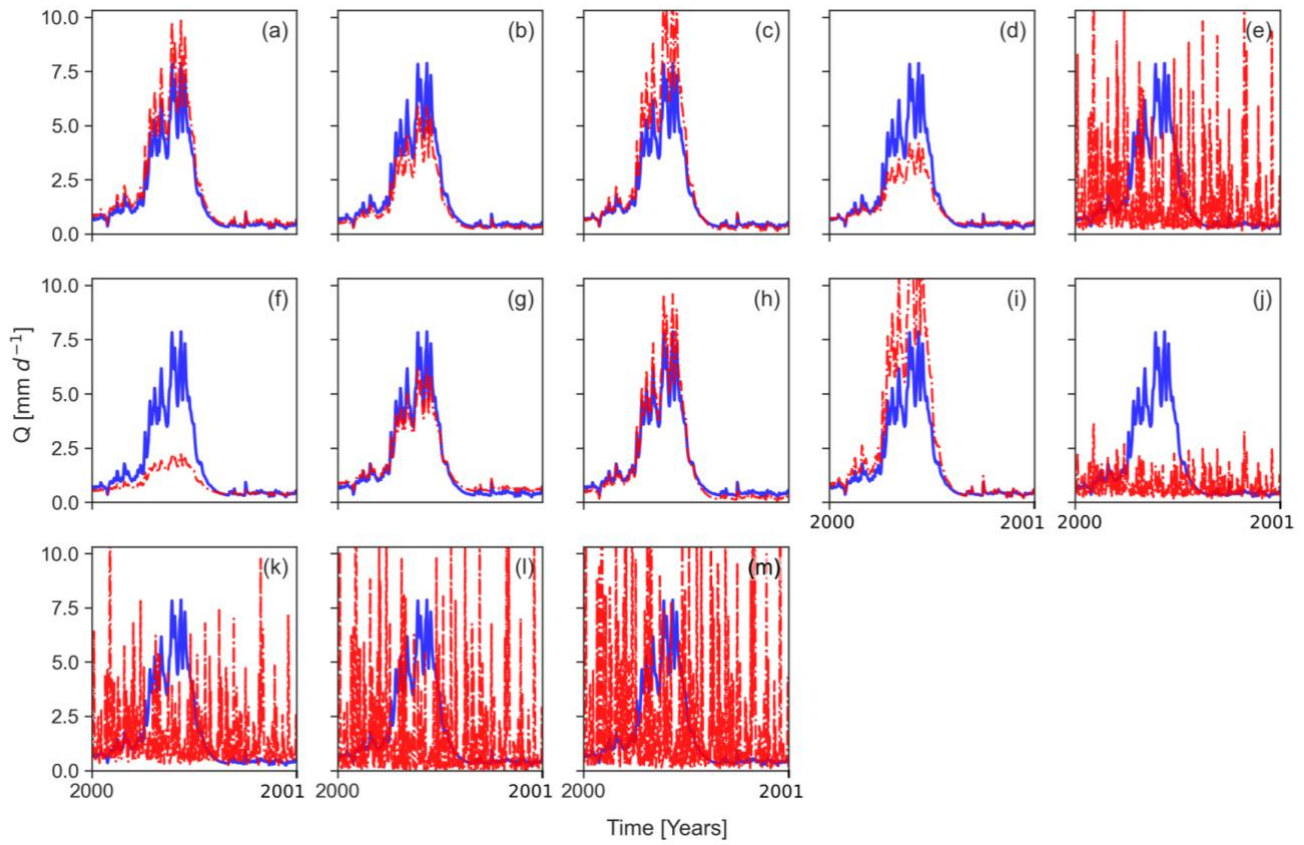

10 **Figure S2: Observed streamflow time series and manipulated streamflow time series for a single year generated by mimicking constant errors, dynamic errors and timing errors (a-m)**

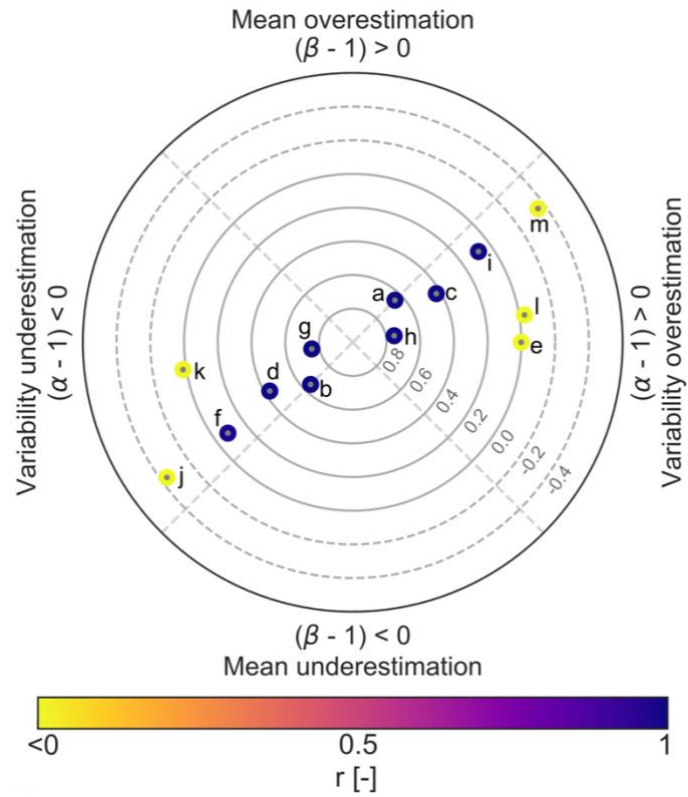

Figure S3: Polar plot of  $KGE$  for manipulated time series generated by mimicking constant errors, dynamic errors and timing errors (a-m)

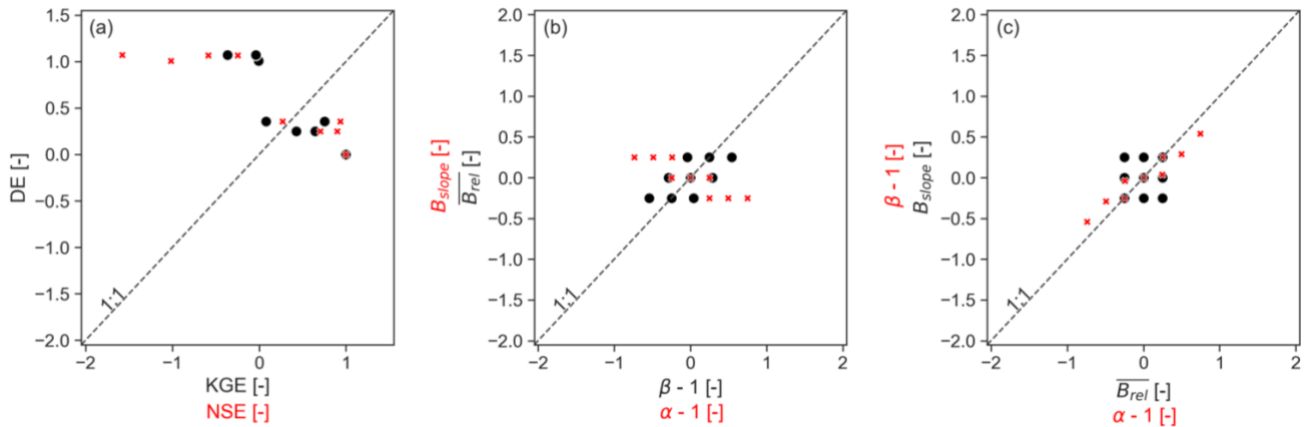

15

Figure S4: (a) Scatterplot to compare  $DE$  with  $KGE$  (black) and  $DE$  with  $NSE$  (red), respectively. (b) Scatterplot to compare  $\overline{B_{rel}}$  with  $\beta$  (black) and  $B_{slope}$  with  $\alpha$  (red), respectively. (c) Scatterplot to compare  $\overline{B_{rel}}$  with  $B_{slope}$  (black) and  $\beta$  with  $\alpha$  (red), respectively. Metrics are calculated for manipulated time series (see Fig. S1)

**Table S1: Comparison of  $DE$  metric terms and  $KGE$  metric terms for manipulated time series generated by mimicking constant errors, dynamic errors and timing errors (a-m)**

|                      | a    | b     | c     | d     | e | f     | g    | h     | i     | j     | k    | l     | m     |
|----------------------|------|-------|-------|-------|---|-------|------|-------|-------|-------|------|-------|-------|
| $\overline{B_{rel}}$ | 0.25 | -0.25 | 0     | 0     | 0 | -0.25 | 0.25 | -0.25 | 0.25  | -0.25 | 0.25 | -0.25 | 0.25  |
| $ B_{area} $         | 0    | 0     | 0.25  | 0.25  | 0 | 0.25  | 0.25 | 0.25  | 0.25  | 0.25  | 0.25 | 0.25  | 0.25  |
| $r$                  | 1    | 1     | 1     | 1     | 0 | 0.98  | 1    | 1     | 1     | 0     | 0    | 0     | 0     |
| $B_{dir}$            | 0    | 0     | -1    | 1     | 0 | 1     | 1    | -1    | -1    | 1     | 1    | -1    | -1    |
| $B_{slope}$          | 0    | 0     | -0.25 | 0.25  | 0 | 0.25  | 0.25 | -0.25 | -0.25 | 0.25  | 0.25 | -0.25 | -0.25 |
| $B_{hf}$             | 0.13 | -0.13 | 0.13  | -0.13 | 0 | -0.25 | 0    | 0     | 0.25  | -0.25 | 0    | 0     | 0.25  |
| $B_{lf}$             | 0.13 | -0.13 | -0.13 | 0.13  | 0 | 0     | 0.25 | -0.25 | 0     | 0     | 0.25 | -0.25 | 0     |
| $B_{tot}$            | 0.25 | 0.25  | 0.25  | 0.25  | 0 | 0.31  | 0.31 | 0.31  | 0.31  | 0.31  | 0.31 | 0.31  | 0.31  |
| $\varepsilon_{hf}$   | 0.5  | -0.5  | 0.5   | -0.5  | 0 | -0.8  | 0    | 0     | 0.8   | -0.8  | 0    | 0     | 0.8   |
| $\varepsilon_{lf}$   | 0.5  | -0.5  | -0.5  | 0.5   | 0 | 0     | 0.8  | -0.8  | 0     | 0     | 0.8  | -0.8  | 0     |
| $\beta$              | 1.25 | 0.75  | 1.29  | 0.71  | 1 | 0.46  | 0.96 | 1.04  | 1.54  | 0.46  | 0.96 | 1.04  | 1.54  |
| $\alpha$             | 1.25 | 0.75  | 1.49  | 0.51  | 1 | 0.25  | 0.76 | 1.24  | 1.75  | 0.25  | 0.76 | 1.24  | 1.75  |

**Table S2:  $DE$  and its metric terms for the modelling example. Simulations were realised with different parameter sets (set\_id).**

| set_id | $\overline{B_{rel}}$ | $ B_{area} $ | $r$  | $B_{dir}$ | $B_{slope}$ | $DE$ | $B_{hf}$ | $B_{lf}$ | $B_{tot}$ | $\varepsilon_{hf}$ | $\varepsilon_{lf}$ |
|--------|----------------------|--------------|------|-----------|-------------|------|----------|----------|-----------|--------------------|--------------------|
| 05     | 0.16                 | 0.32         | 0.88 | 1         | 0.32        | 0.38 | -0.07    | 0.23     | 0.31      | -0.24              | 0.76               |
| 48     | 0.16                 | 0.34         | 0.89 | 1         | 0.34        | 0.40 | -0.08    | 0.24     | 0.32      | -0.26              | 0.74               |
| 94     | 0.11                 | 0.28         | 0.89 | 1         | 0.28        | 0.32 | -0.07    | 0.18     | 0.26      | -0.28              | 0.72 <sup>5</sup>  |

**Table S3:  $KGE$  (with metric terms) and  $NSE$  for the modelling example. Simulations were realised with different parameter sets (set\_id).**

| set_id | $\beta$ | $\alpha$ | $r$  | $KGE$ | $NSE$ |
|--------|---------|----------|------|-------|-------|
| 05     | 0.90    | 0.79     | 0.88 | 0.74  | 0.77  |
| 48     | 0.89    | 0.79     | 0.89 | 0.74  | 0.77  |
| 94     | 0.90    | 0.83     | 0.89 | 0.77  | 0.78  |

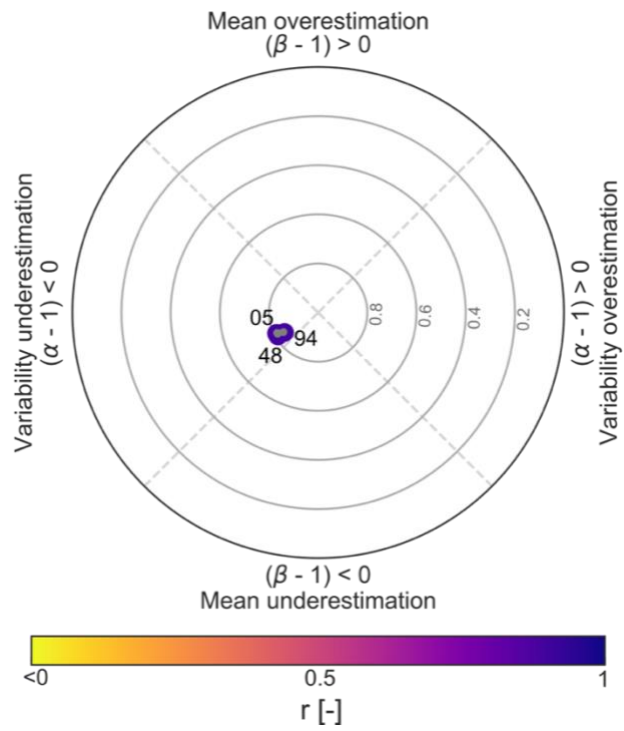

30

**Figure S5: Polar plot of *KGE* for modelling example. Simulations were realised with three different parameter sets (05, 48, 94; see Fig. 4).**
